# Supplementary material for: Influence of Temperature on Transdermal Penetration Enhancing Mechanism of Borneol: A Multi-Scale Study
Source: PubMed Central journal article supplement (PMC5297826; doi:10.3390/ijms18010195), 2017-01-19
Supplement: ijms-18-00195-s001.pdf [file ijms-18-00195-s001.pdf]

# Supplementary Materials: Influence of Temperature on Transdermal Penetration Enhancing Mechanism of Borneol: A Multi-Scale Study

Qianqian Yin, Ran Wang, Shufang Yang, Zhimin Wu, Shujuan Guo, Xingxing Dai, Yanjiang Qiao and Xinyuan Shi

## 1. Interaction of Different Concentrations of BO with SC Lipid Membrane

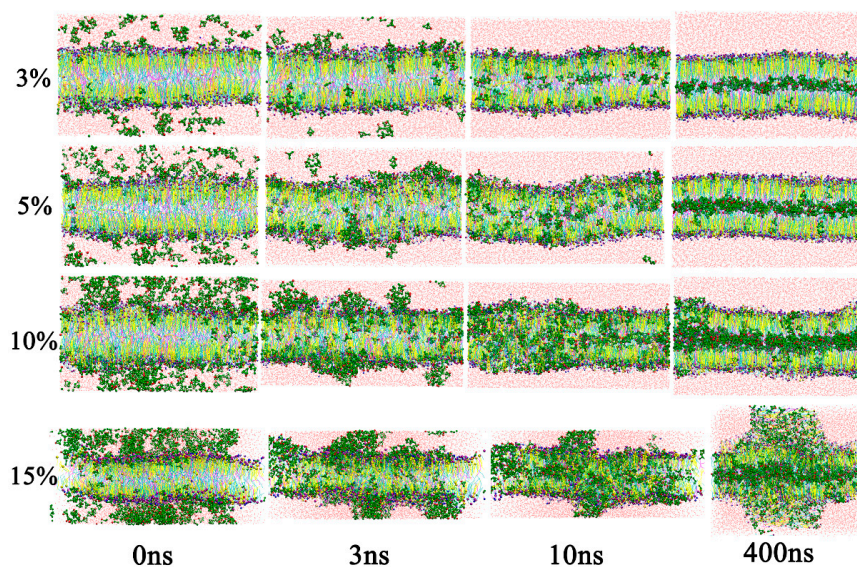

**Figure S1.** The morphology evolution of lipid bilayer systems with different concentrations of BO added during the simulation time.

## 2. Interaction of Different Concentrations of OST with SC Lipid Membrane

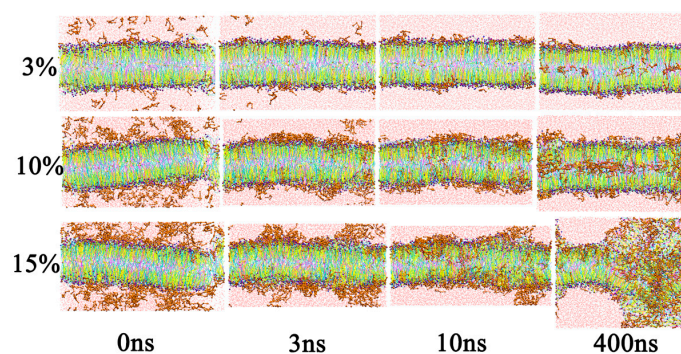

**Figure S2.** The morphology evolution of lipid bilayer systems with different concentrations of OST added during the simulation time.

### 3. Interaction of Different Concentrations of BO and 10%OST with SC Lipid Membrane

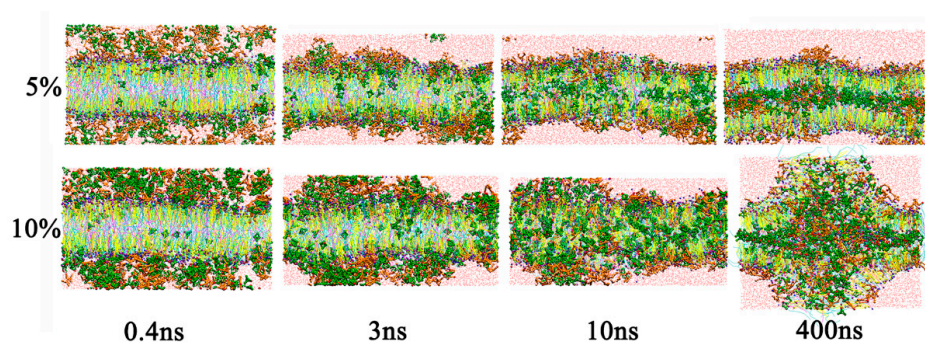

**Figure S3.** The morphology evolution of lipid bilayer systems with different concentrations of BO and 10% OST added during the simulation time.

### 4. Parameterization and Optimization of the CG Model

In this project, the main molecules involved in our simulation systems are ceramides NS 24:0 (CER NS), cholesterol (CHOL), free fatty acids 24:0 (FFA), borneol (BO) and osthole (OST). Among them, the Martini force field parameter for CER, CHOL and FFA were obtained from Marrink's study (see Figure S4 and Table S1).

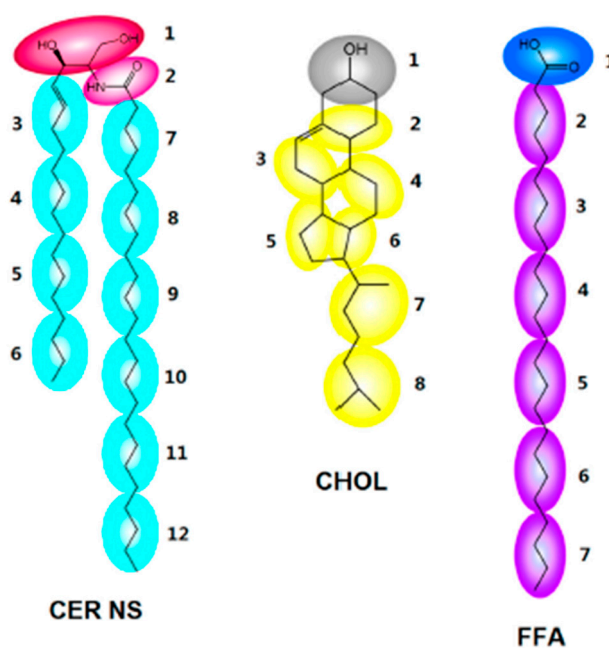

**Figure S4.** CG models of CER NS, CHOL, FFA.

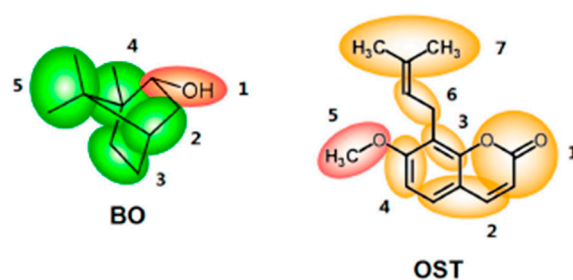

**Figure S5.** CG models of BO and OST.

**Table S1.** Force field parameters of CER NS, CHOL, FFA.

| CER                  |             |                                                              |
|----------------------|-------------|--------------------------------------------------------------|
| Atoms<br>#           | Name        | Type                                                         |
| 1                    | AM1         | P4                                                           |
| 2                    | AM2         | P5                                                           |
| 3                    | D1A         | C3                                                           |
| 4                    | C2A         | C1                                                           |
| 5                    | C3A         | C1                                                           |
| 6                    | C4A         | C1                                                           |
| 7                    | C1B         | C1                                                           |
| 8                    | C2B         | C1                                                           |
| 9                    | C3B         | C1                                                           |
| 10                   | C4B         | C1                                                           |
| 11                   | C5B         | C1                                                           |
| 12                   | C6B         | C1                                                           |
| Bonds<br><i>ij</i>   | Length (nm) | $K_{\text{bond}}$ (kJ·mol <sup>-1</sup> ·nm <sup>-2</sup> )  |
| 1 2                  | 0.27        | 20,000                                                       |
| 1 3                  | 0.29        | 20,000                                                       |
| 3 4                  | 0.47        | 1250                                                         |
| 4 5                  | 0.47        | 1250                                                         |
| 5 6                  | 0.47        | 1250                                                         |
| 2 7                  | 0.37        | 20,000                                                       |
| 7 8                  | 0.47        | 1250                                                         |
| 8 9                  | 0.47        | 1250                                                         |
| 9 10                 | 0.47        | 1250                                                         |
| 10 11                | 0.47        | 1250                                                         |
| 11 12                | 0.47        | 1250                                                         |
| Angles<br><i>ijk</i> | Angle (deg) | $K_{\text{angle}}$ (kJ·mol <sup>-1</sup> ·nm <sup>-2</sup> ) |
| 7 2 1                | 129         | 200                                                          |
| 1 3 4                | 180         | 25                                                           |
| 3 4 5                | 180         | 25                                                           |
| 4 5 6                | 180         | 25                                                           |
| 2 7 8                | 180         | 25                                                           |
| 7 8 9                | 180         | 25                                                           |
| 8 9 10               | 180         | 25                                                           |
| 9 10 11              | 180         | 25                                                           |
| 10 11 12             | 180         | 25                                                           |
| CHOL                 |             |                                                              |
| Atoms<br>#           | Name        | Type                                                         |
| 1                    | ROH         | SP1                                                          |
| 2                    | R1          | SC1                                                          |
| 3                    | R2          | SC3                                                          |
| 4                    | R3          | SC1                                                          |
| 5                    | R4          | SC1                                                          |
| 6                    | R5          | SC1                                                          |
| 7                    | C1          | SC1                                                          |
| 8                    | C2          | C1                                                           |

Table S1. Cont.

| CHOL                            |                    |                                                                                 |
|---------------------------------|--------------------|---------------------------------------------------------------------------------|
| <b>Bonds</b><br><i>ij</i>       | <b>Length (nm)</b> | <b><math>K_{\text{bond}}</math> (kJ·mol<sup>-1</sup>·nm<sup>-2</sup>)</b>       |
| 1 2                             | 0.242              | 20,000                                                                          |
| 2 3                             | 0.260              | 20,000                                                                          |
| 2 4                             | 0.341              | 20,000                                                                          |
| 4 6                             | 0.213              | 20,000                                                                          |
| 4 7                             | 0.544              | 20,000                                                                          |
| 5 6                             | 0.203              | 20,000                                                                          |
| 6 7                             | 0.368              | 20,000                                                                          |
| 7 8                             | 0.425              | 1250                                                                            |
| 1 3                             | 0.493              | constraint                                                                      |
| 1 4                             | 0.604              | constraint                                                                      |
| 3 4                             | 0.272              | constraint                                                                      |
| 3 5                             | 0.346              | constraint                                                                      |
| 4 5                             | 0.294              | constraint                                                                      |
| 5 7                             | 0.406              | constraint                                                                      |
| <b>Angles</b><br><i>ijk</i>     | <b>Angle (deg)</b> | <b><math>K_{\text{angle}}</math> (kJ·mol<sup>-1</sup>·nm<sup>-2</sup>)</b>      |
| 4 7 8                           | 180.0              | 25                                                                              |
| <b>Impropers</b><br><i>ijkl</i> | <b>Angle (deg)</b> | <b><math>K_{\text{impropers}}</math> (kJ·mol<sup>-1</sup>·rad<sup>-2</sup>)</b> |
| 1 3 5 4                         | 0                  | 100                                                                             |
| 1 3 5 7                         | 0                  | 100                                                                             |
| 1 4 5 3                         | 0                  | 100                                                                             |
| 3 5 7 4                         | 0                  | 100                                                                             |
| 4 7 5 3                         | 0                  | 100                                                                             |
| 2 1 3 4                         | -45                | 300                                                                             |
| 2 4 3 1                         | 45                 | 300                                                                             |
| 6 4 5 7                         | -45                | 300                                                                             |
| 6 7 5 4                         | 45                 | 300                                                                             |
| FFA                             |                    |                                                                                 |
| <b>Atoms</b><br>#               | <b>Name</b>        | <b>Type</b>                                                                     |
| 1                               | FAC                | P3                                                                              |
| 2                               | C1                 | C1                                                                              |
| 3                               | C2                 | C1                                                                              |
| 4                               | C3                 | C1                                                                              |
| 5                               | C4                 | C1                                                                              |
| 6                               | C5                 | C1                                                                              |
| 7                               | C6                 | C1                                                                              |
| <b>Bonds</b><br><i>ij</i>       | <b>Length (nm)</b> | <b><math>K_{\text{bond}}</math> (kJ·mol<sup>-1</sup>·nm<sup>-2</sup>)</b>       |
| 1 2                             | 0.370              | 20,000                                                                          |
| 2 3                             | 0.470              | 1250                                                                            |
| 3 4                             | 0.470              | 1250                                                                            |
| 4 5                             | 0.470              | 1250                                                                            |
| 5 6                             | 0.470              | 1250                                                                            |
| 6 7                             | 0.470              | 1250                                                                            |
| <b>Angles</b><br><i>ijk</i>     | <b>Angle (deg)</b> | <b><math>K_{\text{angle}}</math> (kJ·mol<sup>-1</sup>·nm<sup>-2</sup>)</b>      |
| 1 2 3                           | 180.0              | 25                                                                              |
| 2 3 4                           | 180                | 25                                                                              |
| 3 4 5                           | 180                | 25                                                                              |
| 4 5 6                           | 180                | 25                                                                              |
| 5 6 7                           | 180                | 25                                                                              |

Because no Martini force field parameter for BO and OST had been reported before, we parameterized it using method provided in Martini website. Their chemical structures and CG mappings are shown in Figure S5 and their force field parameters are shown in Table S2.

**Table S2.** Force field parameters of BO and OST.

| BO        |             |                                                                  |
|-----------|-------------|------------------------------------------------------------------|
| Atoms     | Name        | Type                                                             |
| #         |             |                                                                  |
| 1         | BOH         | SP1                                                              |
| 2         | BC1         | SC1                                                              |
| 3         | BC2         | SC1                                                              |
| 4         | BC3         | SC1                                                              |
| 5         | BC4         | SC1                                                              |
| Bonds     | Length (nm) | $K_{\text{bond}}$ (kJ·mol <sup>-1</sup> ·nm <sup>-2</sup> )      |
| $ij$      |             |                                                                  |
| 1 2       | 0.38        | 20,000                                                           |
| 1 4       | 0.38        | 20,000                                                           |
| 2 3       | 0.38        | 20,000                                                           |
| 2 5       | 0.38        | 20,000                                                           |
| 3 4       | 0.38        | 20,000                                                           |
| 4 5       | 0.38        | 20,000                                                           |
| 2 4       | 0.41        | constraints                                                      |
| Angles    | Angle (deg) | $K_{\text{angle}}$ (kJ·mol <sup>-1</sup> ·nm <sup>-2</sup> )     |
| $ijk$     |             |                                                                  |
| 1 2 3     | 93.375      | 25                                                               |
| 1 2 5     | 93.375      | 25                                                               |
| 1 4 3     | 93.375      | 25                                                               |
| 1 4 5     | 93.375      | 25                                                               |
| 3 4 5     | 93.369      | 25                                                               |
| 3 2 5     | 93.369      | 25                                                               |
| 4 5 2     | 65.684      | 25                                                               |
| Dihedrals | Angle (deg) | $K_{\text{dihedral}}$ (kJ·mol <sup>-1</sup> ·rad <sup>-2</sup> ) |
| $ijkl$    |             |                                                                  |
| 5 2 4 1   | 120         | 100                                                              |
| 5 4 2 3   | 120         | 300                                                              |
| 3 4 2 1   | 120         | 100                                                              |
| OST       |             |                                                                  |
| Atoms     | Name        | Type                                                             |
| #         |             |                                                                  |
| 1         | OS1         | SNa                                                              |
| 2         | OS2         | SC4                                                              |
| 3         | OS3         | SC4                                                              |
| 4         | OS4         | SC4                                                              |
| 5         | OS5         | SN0                                                              |
| 6         | OS6         | SC3                                                              |
| 7         | OS7         | C3                                                               |

Table S2. Cont.

| OST                      |             |                                                                  |
|--------------------------|-------------|------------------------------------------------------------------|
| Bonds<br><i>ij</i>       | Length (nm) | $K_{\text{bond}}$ (kJ·mol <sup>-1</sup> ·nm <sup>-2</sup> )      |
| 4 5                      | 0.43        | 1250                                                             |
| 3 6                      | 0.43        | 1250                                                             |
| 6 7                      | 0.43        | 5000                                                             |
| 1 2                      | 0.27        | constraints                                                      |
| 1 3                      | 0.27        | constraints                                                      |
| 2 3                      | 0.27        | constraints                                                      |
| 2 4                      | 0.27        | constraints                                                      |
| 3 4                      | 0.27        | constraints                                                      |
| Angles<br><i>ijk</i>     | Angle (deg) | $K_{\text{angle}}$ (kJ·mol <sup>-1</sup> )                       |
| 2 4 5                    | 162.20      | 25.0                                                             |
| 3 4 5                    | 102.62      | 25.0                                                             |
| 1 3 6                    | 120.64      | 25.0                                                             |
| 2 3 6                    | 162.90      | 25.0                                                             |
| 4 3 6                    | 116.48      | 25.0                                                             |
| 3 6 7                    | 115.86      | 45.0                                                             |
| Dihedrals<br><i>ijkl</i> | Angle (deg) | $K_{\text{dihedral}}$ (kJ·mol <sup>-1</sup> ·rad <sup>-2</sup> ) |
| 1 2 4 3                  | 0.000       | 50                                                               |
| 5 2 3 4                  | 0.553       | 50                                                               |
| 6 2 4 3                  | 9.113       | 50                                                               |

Then, in order to validate the accuracy of our model, we calculated the bond distributions of molecules in all atoms (AA) and CG levels. The results shown in Figures S6 and S7 indicated that all the bond distributions of BO and OST in CG representations were similar to those in the AA representations, which demonstrated that our CG models are valid for further simulation studies.

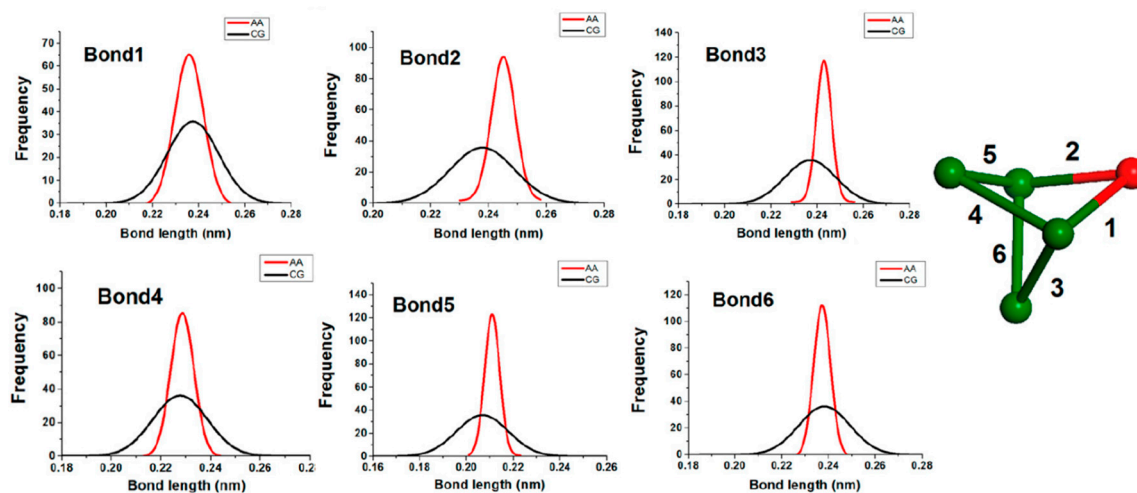

Figure S6. Bond distributions of BO molecules calculated from AA and CG simulations.

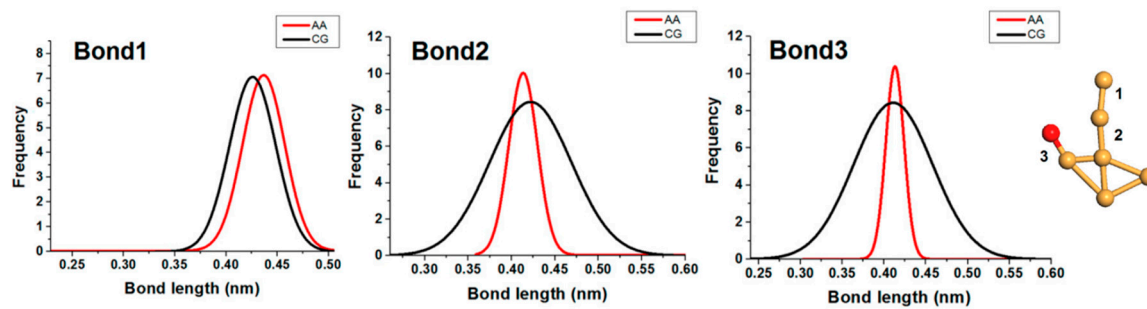

Figure S7. Bond distributions of OST molecules calculated from AA and CG simulations.
